# Supplementary material for: Sea Urchin-like Si@MnO2@rGO as Anodes for High-Performance Lithium-Ion Batteries
Source: MDPI journal article supplement (doi:10.3390/nano12020285), 2022-01-17
Supplement: s1 [file s1]

Supplementary Materials

# Sea Urchin-Like Si@MnO<sub>2</sub>@rGO as Anodes for High-Performance Lithium-Ion Batteries

Jiajun Liu, Meng Wang, Qi Wang, Xishan Zhao, Yutong Song, Tianming Zhao and Jing Sun \*

College of Sciences, Northeastern University, Shenyang 110819, China; 2000165@stu.neu.edu.cn (J.L.); 2000176@stu.neu.edu.cn (M.W.); wangqi@mail.neu.edu.cn (Q.W.); 2000189@stu.neu.edu.cn (X.Z.); 2000172@stu.neu.edu.cn (Y.S.); zhaotm@stumail.neu.edu.cn (T.Z.).

\* Correspondence: sunjing74@mail.neu.edu.cn; Tel.: +86 136-0407-3045

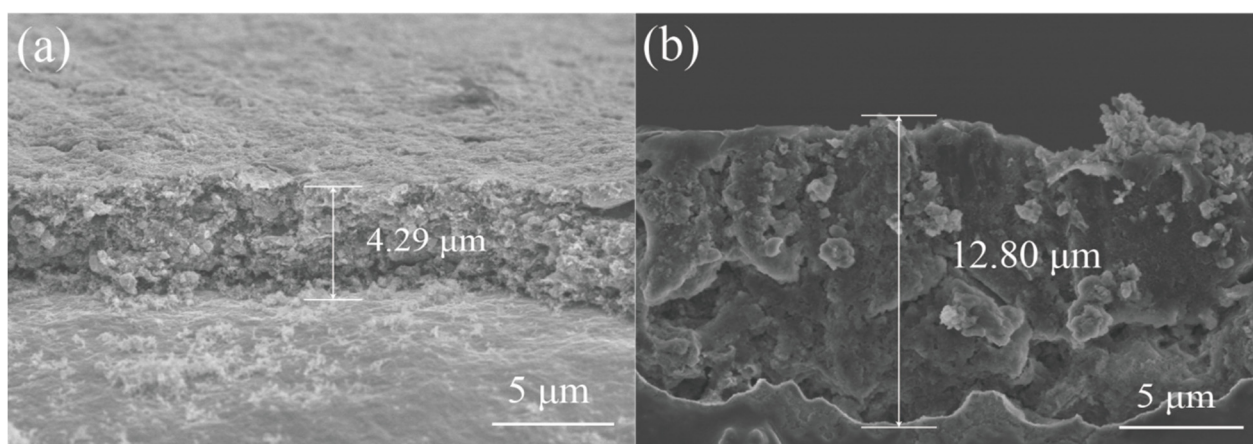

**Figure S1.** (a,b) Cross-sectional SEM images of Si@MnO<sub>2</sub>-50°C before and after 150 cycles.

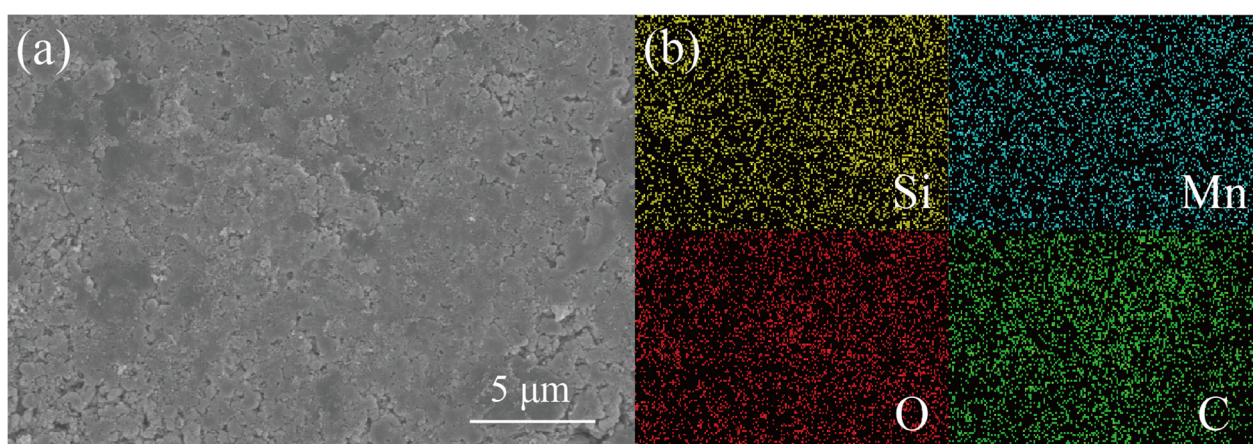

**Figure S2.** (a) Cross-sectional SEM images of the Si@MnO<sub>2</sub>@rGO-50°C electrode sheet after 150 cycles at 0.1 A g<sup>-1</sup>. (b) Element mapping images of the Si@MnO<sub>2</sub>@rGO-50°C electrode sheet after 150 cycles at 0.1 A g<sup>-1</sup>.

**Table S1.** Capacity contribution of Si, MnO<sub>2</sub> and rGO.

| Sample           | Theoretical Capacity     | Atom Percentage | Weight Percentage | Capacity Contribution |
|------------------|--------------------------|-----------------|-------------------|-----------------------|
| Si               | 4200 mAh g <sup>-1</sup> | 47%             | 32%               | 63.3%                 |
| MnO <sub>2</sub> | 1223 mAh g <sup>-1</sup> | 31%             | 62%               | 35.6%                 |
| rGO              | 372 mAh g <sup>-1</sup>  | 21%             | 6%                | 1.1%                  |

**Table S2.** Synthesis strategies and electrochemical performance comparison Si-based anode materials and MnO<sub>2</sub>-based anode materials in lithium-ion batteries.

| Sample                                                     | Synthesis Method                                     | Cycle Retention                                     | Cycling Stability (mAh/g)                                               | Refs.     |
|------------------------------------------------------------|------------------------------------------------------|-----------------------------------------------------|-------------------------------------------------------------------------|-----------|
| Si@MnO <sub>2</sub> @rGO                                   | Stirring and freeze-dry                              | 88% after 1000 cycles at 1A g <sup>-1</sup>         | 1282 mAh g <sup>-1</sup> after 1000 cycles at 1A g <sup>-1</sup>        | This work |
| Porous Si/rGO                                              | Stirring, chemical etching and water bath.           | 75% after 200 cycles at 1 A g <sup>-1</sup>         | About 1026mAh g <sup>-1</sup> after 50 cycles at 1 A g <sup>-1</sup>    | [61]      |
| Si/rGO                                                     | Stirring, freeze-dry and thermal treatment           | 53% after 200 cycles at 1 A g <sup>-1</sup>         | About 550mAh g <sup>-1</sup> after 200 cycles at 1 A g <sup>-1</sup>    | [20]      |
| Si/rGO                                                     | Stirring, chemical etching, calcine and ball-milling | 67% after 300 cycles at 0.5 A g <sup>-1</sup>       | 548 mAh g <sup>-1</sup> after 300 cycles at 0.5 A g <sup>-1</sup>       | [46]      |
| CL-Si@C/rGO                                                | Calcine and stirring                                 | About 50% after 100 cycles at 1 A g <sup>-1</sup>   | 910 mAh g <sup>-1</sup> after 100 cycles at 1 A g <sup>-1</sup>         | [62]      |
| $\alpha$ -Fe <sub>2</sub> O <sub>3</sub> /MnO <sub>2</sub> | Calcine and stirring                                 | About 62% after 500 cycles at 0.5 A g <sup>-1</sup> | 494 mAh g <sup>-1</sup> after 500 cycles at 0.5 A g <sup>-1</sup>       | [63]      |
| MnO <sub>2</sub> /rGO                                      | Hydrothermal method                                  | About 44% after 500 cycles at 0.5 A g <sup>-1</sup> | About 500 mAh g <sup>-1</sup> after 500 cycles at 0.5 A g <sup>-1</sup> | [64]      |

**Table S3.** The R<sub>s</sub> and R<sub>CT</sub> values fitted from the equivalent circuit model are summarized for comparison.

| Electrode                      | R <sub>s</sub> /Ω | R <sub>CT</sub> /Ω |
|--------------------------------|-------------------|--------------------|
| Si                             | 5.8               | 272.1              |
| Si@MnO <sub>2</sub>            | 3.8               | 233.0              |
| Si@MnO <sub>2</sub> @rGO       | 11.3              | 146.2              |
| Si@MnO <sub>2</sub> @rGO-150th | 13.7              | 72.7               |
